# Supplementary material
Source: Springer Nature journal article supplement (https://www.springermedizin.de/resource/supplementary/13063_2014_2089_MOESM1_ESM.pdf/9621358)

Consort flow diagram illustrating STRIDE Study

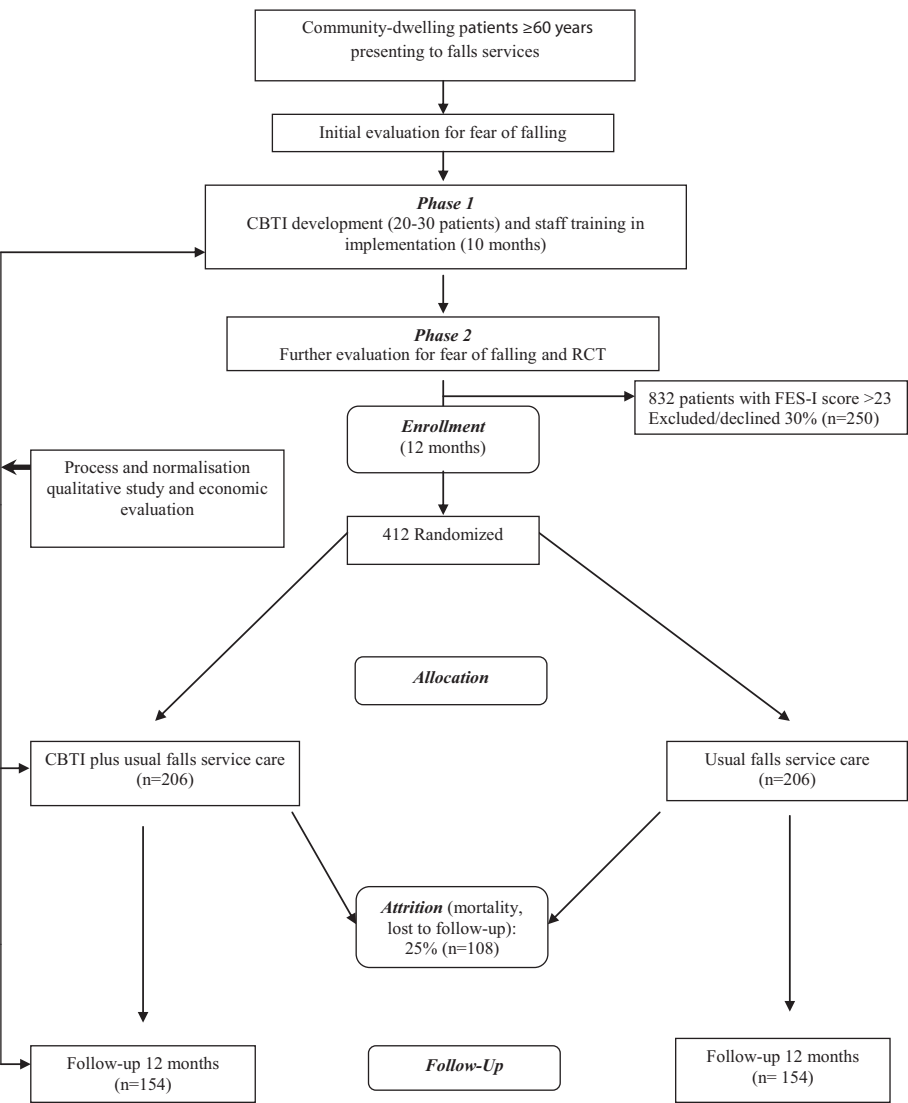

Supplement: MOESM1 [file 9621358]
